# Supplementary material
Source: HighWire-hosted journal article supplement (https://thorax.bmj.com/content/thoraxjnl-2018-211967)

**Automated O<sub>2</sub> titration improves exercise capacity in patients with hypercapnic Chronic Obstructive Pulmonary Disease**

Isabelle Vivodtzev<sup>1,2</sup>, Erwan L'Her<sup>3</sup>, Gabrielle Vottero<sup>4</sup>, Claire Yankoff<sup>4</sup>, Renaud Tamisier<sup>1</sup>, François Maltais<sup>5</sup>, François Lellouche<sup>5</sup>, Jean-Louis Pépin<sup>1</sup>

**Supplementary Material**

|                      |         |
|----------------------|---------|
| Methods section..... | page 2  |
| Table E1.....        | page 6  |
| Table E2.....        | page 7  |
| Figure Legend.....   | page 8  |
| Figure E1.....       | page 9  |
| Figure E2.....       | page 10 |
| Figure E3.....       | page 11 |

## **METHODS**

### **Trial design and participants**

We conducted a randomized, double-blinded crossover controlled study. Twelve patients older than 40 years with severe COPD (Gold III-IV), hypercapnia (resting PaCO<sub>2</sub> > 45mmHg) and requiring long-term oxygen therapy were included in the study from outpatient (4/12) and inpatient (8/12) rehabilitation clinics. Recruitment took place at the Grenoble University Hospital (Grenoble, France) and at the rehabilitation centre “Les Rieux” (Nyons, France). Exclusion criteria were exacerbation within four weeks before inclusion or current medical condition, other than COPD, that constitute a limitation to walk (orthopaedic or rheumatologic disorders). The study was approved by the institutional ethics committee and a signed consent was obtained from each participant (CPP Sud Est V, 11-AGIR-01). The clinical trials registration number is NCT01575327. A consort flowchart is shown on Figure E1.

### **Randomization and blinding**

Following baseline assessment, patients were randomly assigned (1:1) by a blinded statistician using a computer-generated allocation sequence to use either adjusted O<sub>2</sub> flows or constant O<sub>2</sub> flows during the first endurance walking test. Then, the other O<sub>2</sub> supplementation strategy was applied for the second test. Patients, investigators and research assistants were all blinded for testing conditions. One research assistant oversaw the randomization (computer generated) and the experimental setting. The research assistant was not otherwise involved in patient supervision during exercise or data analysis.

## Procedure/ Interventions

### *Automatically-adjusted O<sub>2</sub> flow rates device*

In the present study, we used the FreeO<sub>2</sub> system that automatically adjusts every second oxygen flow using a closed-loop algorithm based on measured versus targeted SpO<sub>2</sub>. It provides continuous monitoring of cardio-respiratory parameters in spontaneously breathing patients (SpO<sub>2</sub>, O<sub>2</sub> flow rate, heart rate)<sup>23,24</sup>. This system can deliver from 0 to 20L/min, with 0.1L/min incremental or decremental steps, on a per second basis.

### *Protocol (Figure E2)*

The study consisted in two preliminary visits and two experimental visits for the cross over comparison. During the first preliminary visit, demographics, spirometry and arterial blood gases were collected and an incremental shuttle walking test was performed to determine peak walking speed, as previously described<sup>26</sup>. This test was performed while patients received their usual O<sub>2</sub> supplementation during exercise (resting flow + ~1L/min). During the second preliminary visit, a first endurance shuttle walking test was performed for familiarization purposes<sup>27</sup>. These visits were followed by the two experimental visits completed in a random order, on different days and separated by at least 48 hours (washout period =  $4.0 \pm 4.6$  days). Each experimental visit consisted in an endurance shuttle walking test (ESWT) performed at 85 % estimated peak VO<sub>2</sub><sup>28</sup> during which participants breathed: (i) oxygen delivered at the usual fixed flow, ~1L/min above the resting flow rate as recommended<sup>14</sup> (constant O<sub>2</sub> flow), or (ii) oxygen at variable flows (FreeO<sub>2</sub>) set at SpO<sub>2</sub> > 94%. The oxygen was delivered through nasal cannulas (Softech Bi-Flo Cannula, Teleflex). During both ESWTs, the FreeO<sub>2</sub> system was used,

either in the titration mode during which O<sub>2</sub> flows were variable or in the recording mode during which O<sub>2</sub> flow was constant. After each ESWT, physiologic data were recorded during 10 minutes of recovery. Before each ESWT, a spirometry was performed to confirm patients' clinical stability.

## **Outcomes**

The primary outcome of the study was the walking endurance time (and the corresponding walking distance). Secondary outcomes included time spent within pre-specified SpO<sub>2</sub> targets (< 88% and between 92 and 96%), capillary blood gases (PcO<sub>2</sub>, PcCO<sub>2</sub>), heart rate (HR), dyspnea and leg fatigue. In addition to the parameters continuously collected by the system FreeO<sub>2</sub> (SpO<sub>2</sub> and HR), earlobe capillary blood gases were obtained before, at the end, and 10 min post exercise. A modified Borg scale was used to assess dyspnea and leg-fatigue scores at one-minute intervals during exercise and at the end of exercise. Isotime exercise was assessed for HR, dyspnea and leg fatigue. It corresponded to the longest time duration reached during the ESWT in both conditions (automatically-adjusted O<sub>2</sub> flow and constant O<sub>2</sub> flow). Warm-up was included in the calculation of the endurance time.

## **Statistical Analysis**

### *Sample size calculation*

The sample size calculation was based on preliminary data from the work of Lellouche et al.<sup>29</sup>. In this study, walking endurance time in patients with severe COPD averaged 264 ± 102 sec and was increased by 43 % with FreeO<sub>2</sub>, as compared to constant O<sub>2</sub> flow<sup>29</sup>. Based on this

dataset and on the hypothesis that FreeO<sub>2</sub> would have a similar exercise-enhancing effect in patients with severe COPD and chronic respiratory failure, we calculated that 12 completed patients would be necessary in a cross-over trial to provide a statistical power of 80% at the 0.05 level.

### *Data analysis*

Data were expressed using mean +/- SD to summarize subjects' characteristics. Continuous variables were analysed using a mixed model. The statistical models were fitted to compare heterogeneous variances among conditions and were tested whether the models could be reduced to a mixed model with the same variance across the factor levels. The univariate normality assumption was verified with the Shapiro-Wilk tests on the error distribution from the statistical model after a Cholesky factorization. The Brown and Forsythe's variation of Levene's test statistic was used to verify the homogeneity of variances. When appropriate, some variables (including number of shuttles; endurance time; walking distance and isotime-exercise dyspnoea borg score) were log-transformed to fulfil the model assumptions and reported p-values are based on these transformations. When these assumptions were not fulfilled after a log-transformation, an alternative procedure that does not depend on these assumptions was performed. The statistical approach used was to replace the observations by their rank within subjects, called rank transformation, and applying the ordinary F test from the mixed model. This technique is an approximate procedure results and has good statistical properties when compared to exact tests. Correlation between changes in endurance time and pulmonary function were assessed using Pearson (when normality passed) or Spearman correlation coefficient (when Normality failed). The results were considered

significant when p-values were < 0.05. All analyses were conducted using the statistical packages R v3.0.2 (R Foundation for Statistical Computing, Vienna, Austria.) and SAS v9.4 (SAS Institute Inc, Cary, NC, U.S.A.).

**Table E1: patients' characteristics**

|                                                 |             |
|-------------------------------------------------|-------------|
| Gender (M/F)                                    | 5/7         |
| Age                                             | 65 ± 10     |
| BMI, kg/m <sup>2</sup>                          | 25 ± 7      |
| <b><i>GOLD stages &amp; smoking history</i></b> |             |
| Pack-years smoking                              | 43 ± 22     |
| Current smokers                                 | 3 (25%)     |
| Number of exacerbation / year                   | 1.3 ± 0.5   |
| OLD since                                       | 7.5 ± 5.0   |
| <b><i>Lung function</i></b>                     |             |
| FEV <sub>1</sub> , L                            | 0.70 ± 0.25 |
| FEV <sub>1</sub> , % pred.                      | 30 ± 9      |
| FVC, L                                          | 1.64 ± 0.74 |
| FVC, % pred.                                    | 44 ± 7      |
| FEV <sub>1</sub> / FVC, % pred.                 | 50 ± 15     |
| TLC, L.                                         | 6.53 ± 1.19 |
| TLC, % pred.                                    | 124 ± 25    |
| IC, L                                           | 1.42 ± 0.50 |
| FRC, L                                          | 5.09 ± 1.28 |
| RV, L                                           | 4.73 ± 1.26 |
| RV, % pred.                                     | 225 ± 76    |
| VR/CPT %                                        | 71 ± 7      |
| DLCO %                                          | 32 ± 18     |
| <b><i>Physiological parameters</i></b>          |             |
| PaO <sub>2</sub> , mmHg                         | 62.0 ± 6.4  |
| PaCO <sub>2</sub> , mmHg                        | 48.7 ± 3.0  |
| pH                                              | 7.42 ± 0.03 |
| HCO <sub>3</sub> <sup>-</sup>                   | 31.5 ± 3.8  |
| <b><i>Functional capacity</i></b>               |             |
| 6MWD (m)                                        | 352 ± 52    |
| Mean SaO <sub>2</sub> during 6MWD               | 89 ± 2.5    |
| MRC score                                       | 3.0 ± 0.6   |
| <b><i>Cardiovascular comorbidities</i></b>      |             |
| Treated hypertension                            | 6 (50%)     |
| Cardiac failure                                 | 4 (33%)     |

|                           |         |
|---------------------------|---------|
| Obesity / Type 2 diabetes | 4 (33%) |
|---------------------------|---------|

***Medication***

|                           |          |
|---------------------------|----------|
| Short-acting beta agonist | 11 (92%) |
|---------------------------|----------|

|                          |         |
|--------------------------|---------|
| Long-acting beta agonist | 6 (50%) |
|--------------------------|---------|

|                 |         |
|-----------------|---------|
| Corticosteroids | 6 (50%) |
|-----------------|---------|

|                 |         |
|-----------------|---------|
| Anticholinergic | 8 (66%) |
|-----------------|---------|

---

**Table E2: unexpected event report**

| <b>Patient</b> | <b>Unexpected event</b>                                                                        | <b>Timing</b> | <b>Dropped out</b> |
|----------------|------------------------------------------------------------------------------------------------|---------------|--------------------|
| #3             | Patient stopped after the VO <sub>2</sub> max test –<br>He felt too weak to continue the study | Visit #1      | Yes                |



## Figure Legend

**Figure E1:** Study Flowchart

**Figure E2:** Study design

**Figure E3:** Individual data of lowest O<sub>2</sub> saturation during the ESWT when using constant O<sub>2</sub> flows or automatically titrated O<sub>2</sub> flows (FreeO<sub>2</sub>). Average lowest O<sub>2</sub> saturation was  $83.6 \pm 7.0$  % with constant O<sub>2</sub> flow vs.  $89.5 \pm 3.9$  % with FreeO<sub>2</sub> ( $p < 0.001$ ).

**Figure E1:** Study Flowchart

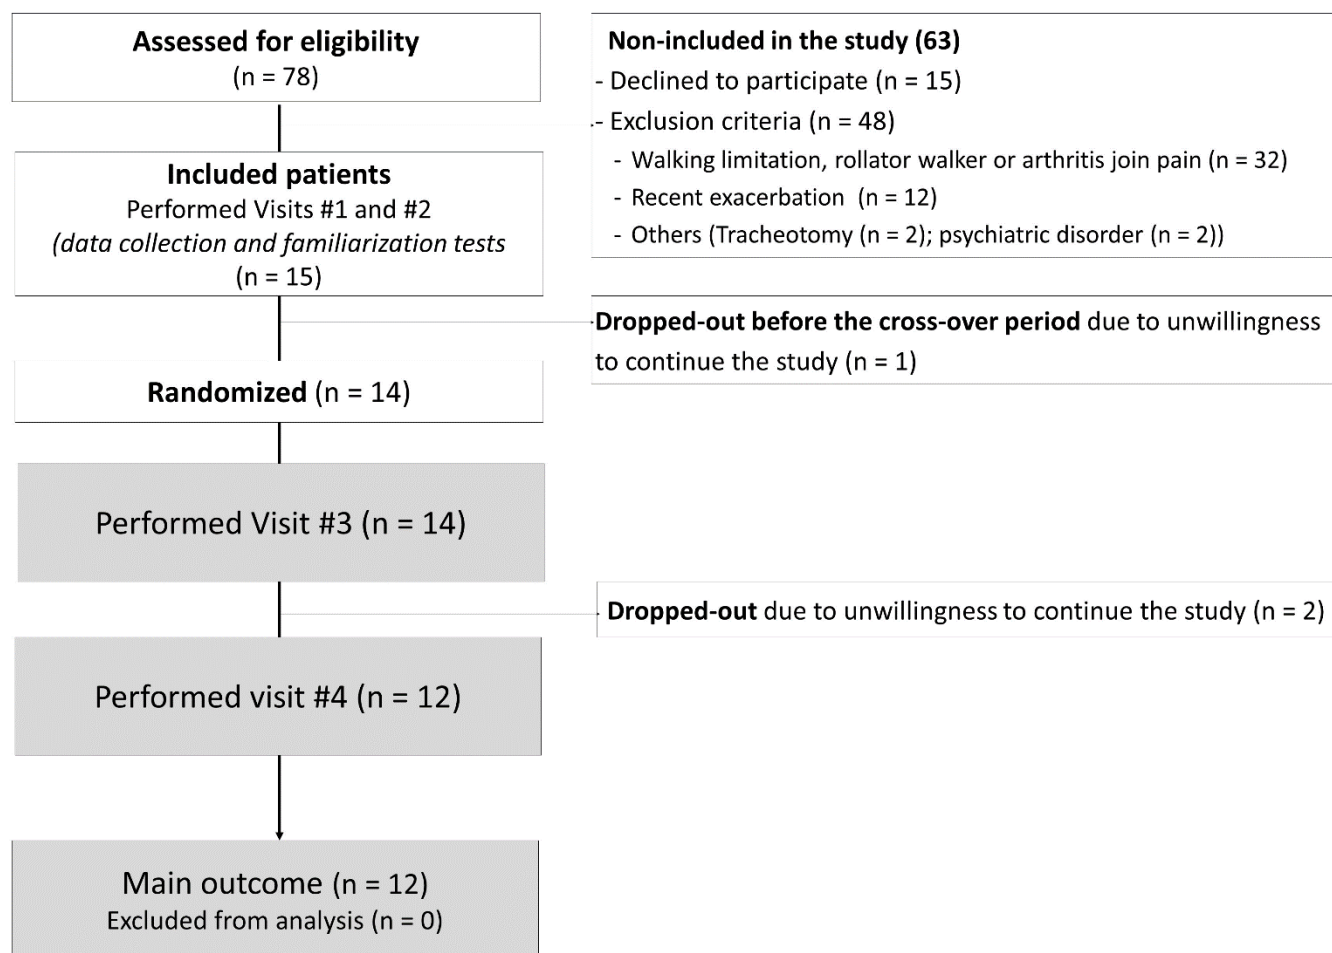

Figure E2

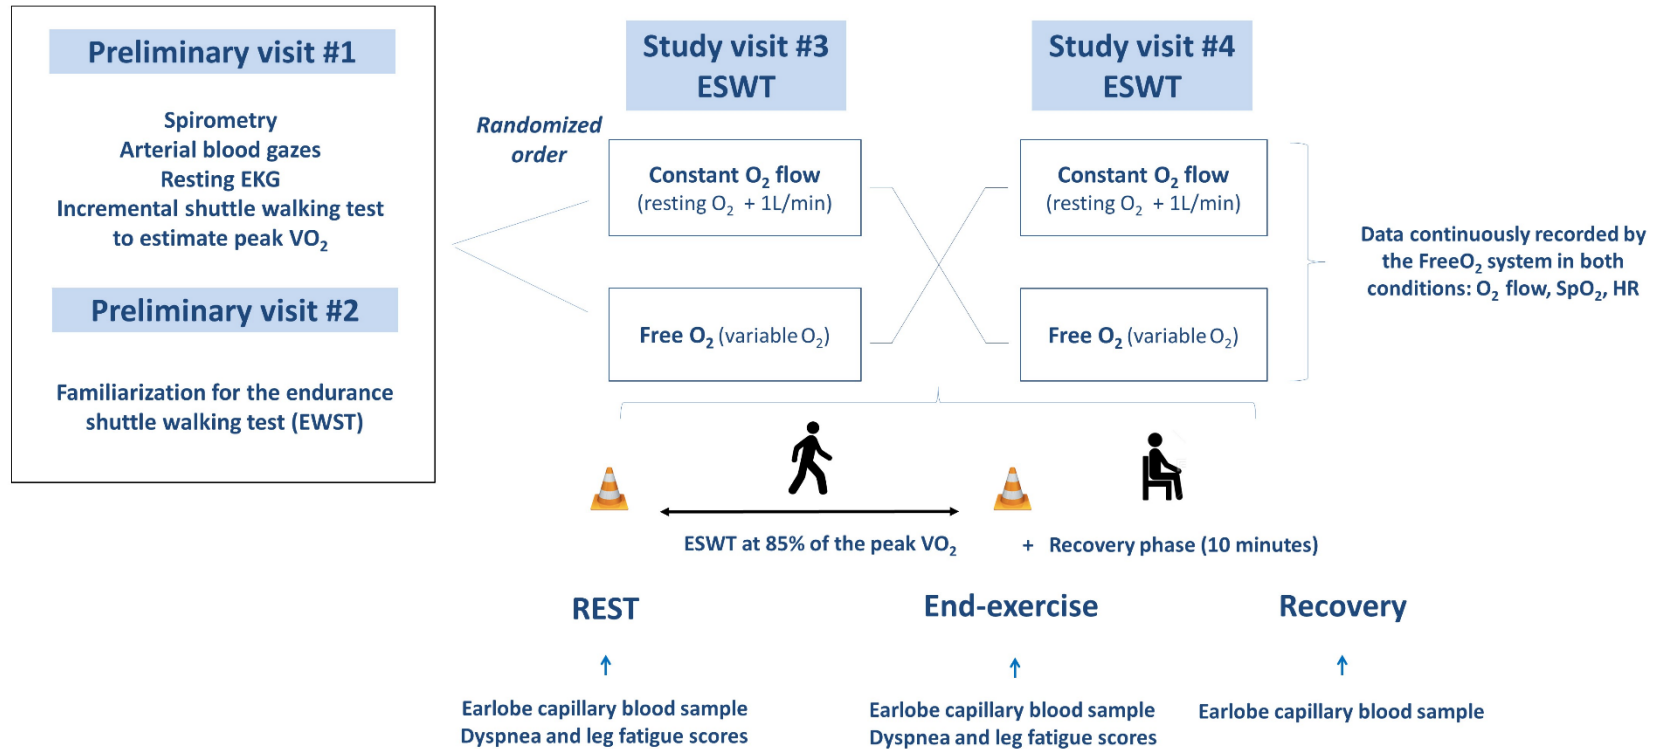

**Figure E3**

Lowest SaO<sub>2</sub> (%)  
during the ESWT

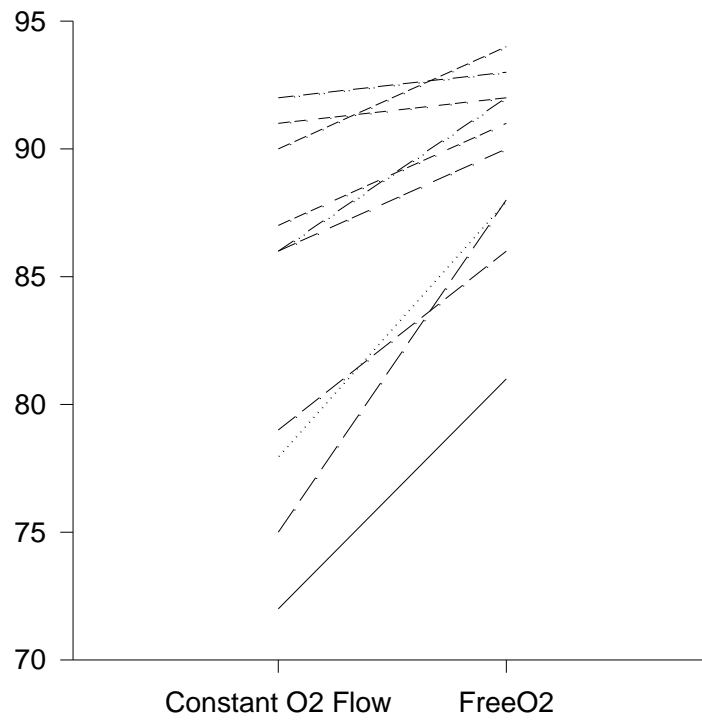

Supplement: inline-supplementary-material-1 [file inline-supplementary-material-1.pdf]
